# Supplementary material for: Evaluation of InSAR Tropospheric Correction by Using Efficient WRF Simulation with ERA5 for Initialization
Source: MDPI journal article supplement (doi:10.3390/rs15010273), 2023-01-02
Supplement: s1 [file s1]

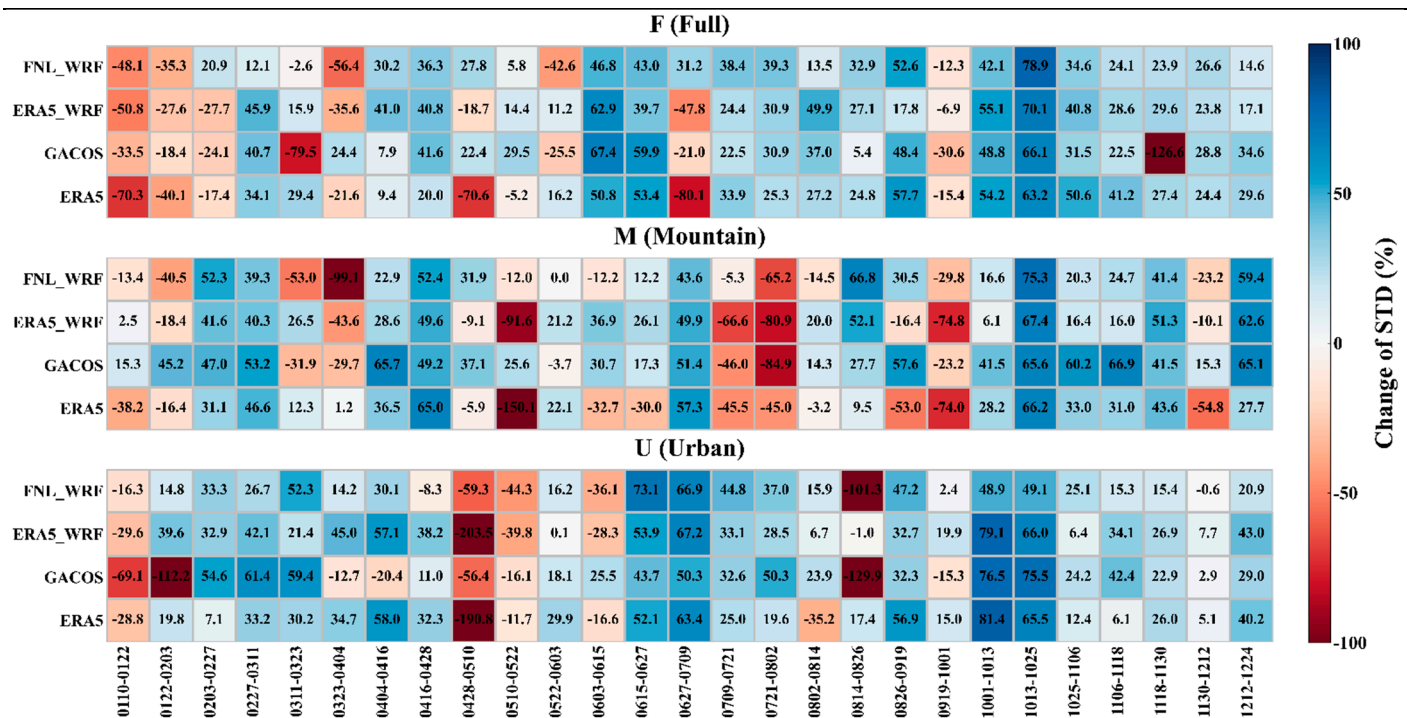

**Figure S1.** Percentages of reduction in RMS errors in the interferograms and percentages of increase after correction by different methods in areas F (first row), M (second row), and U(third row).

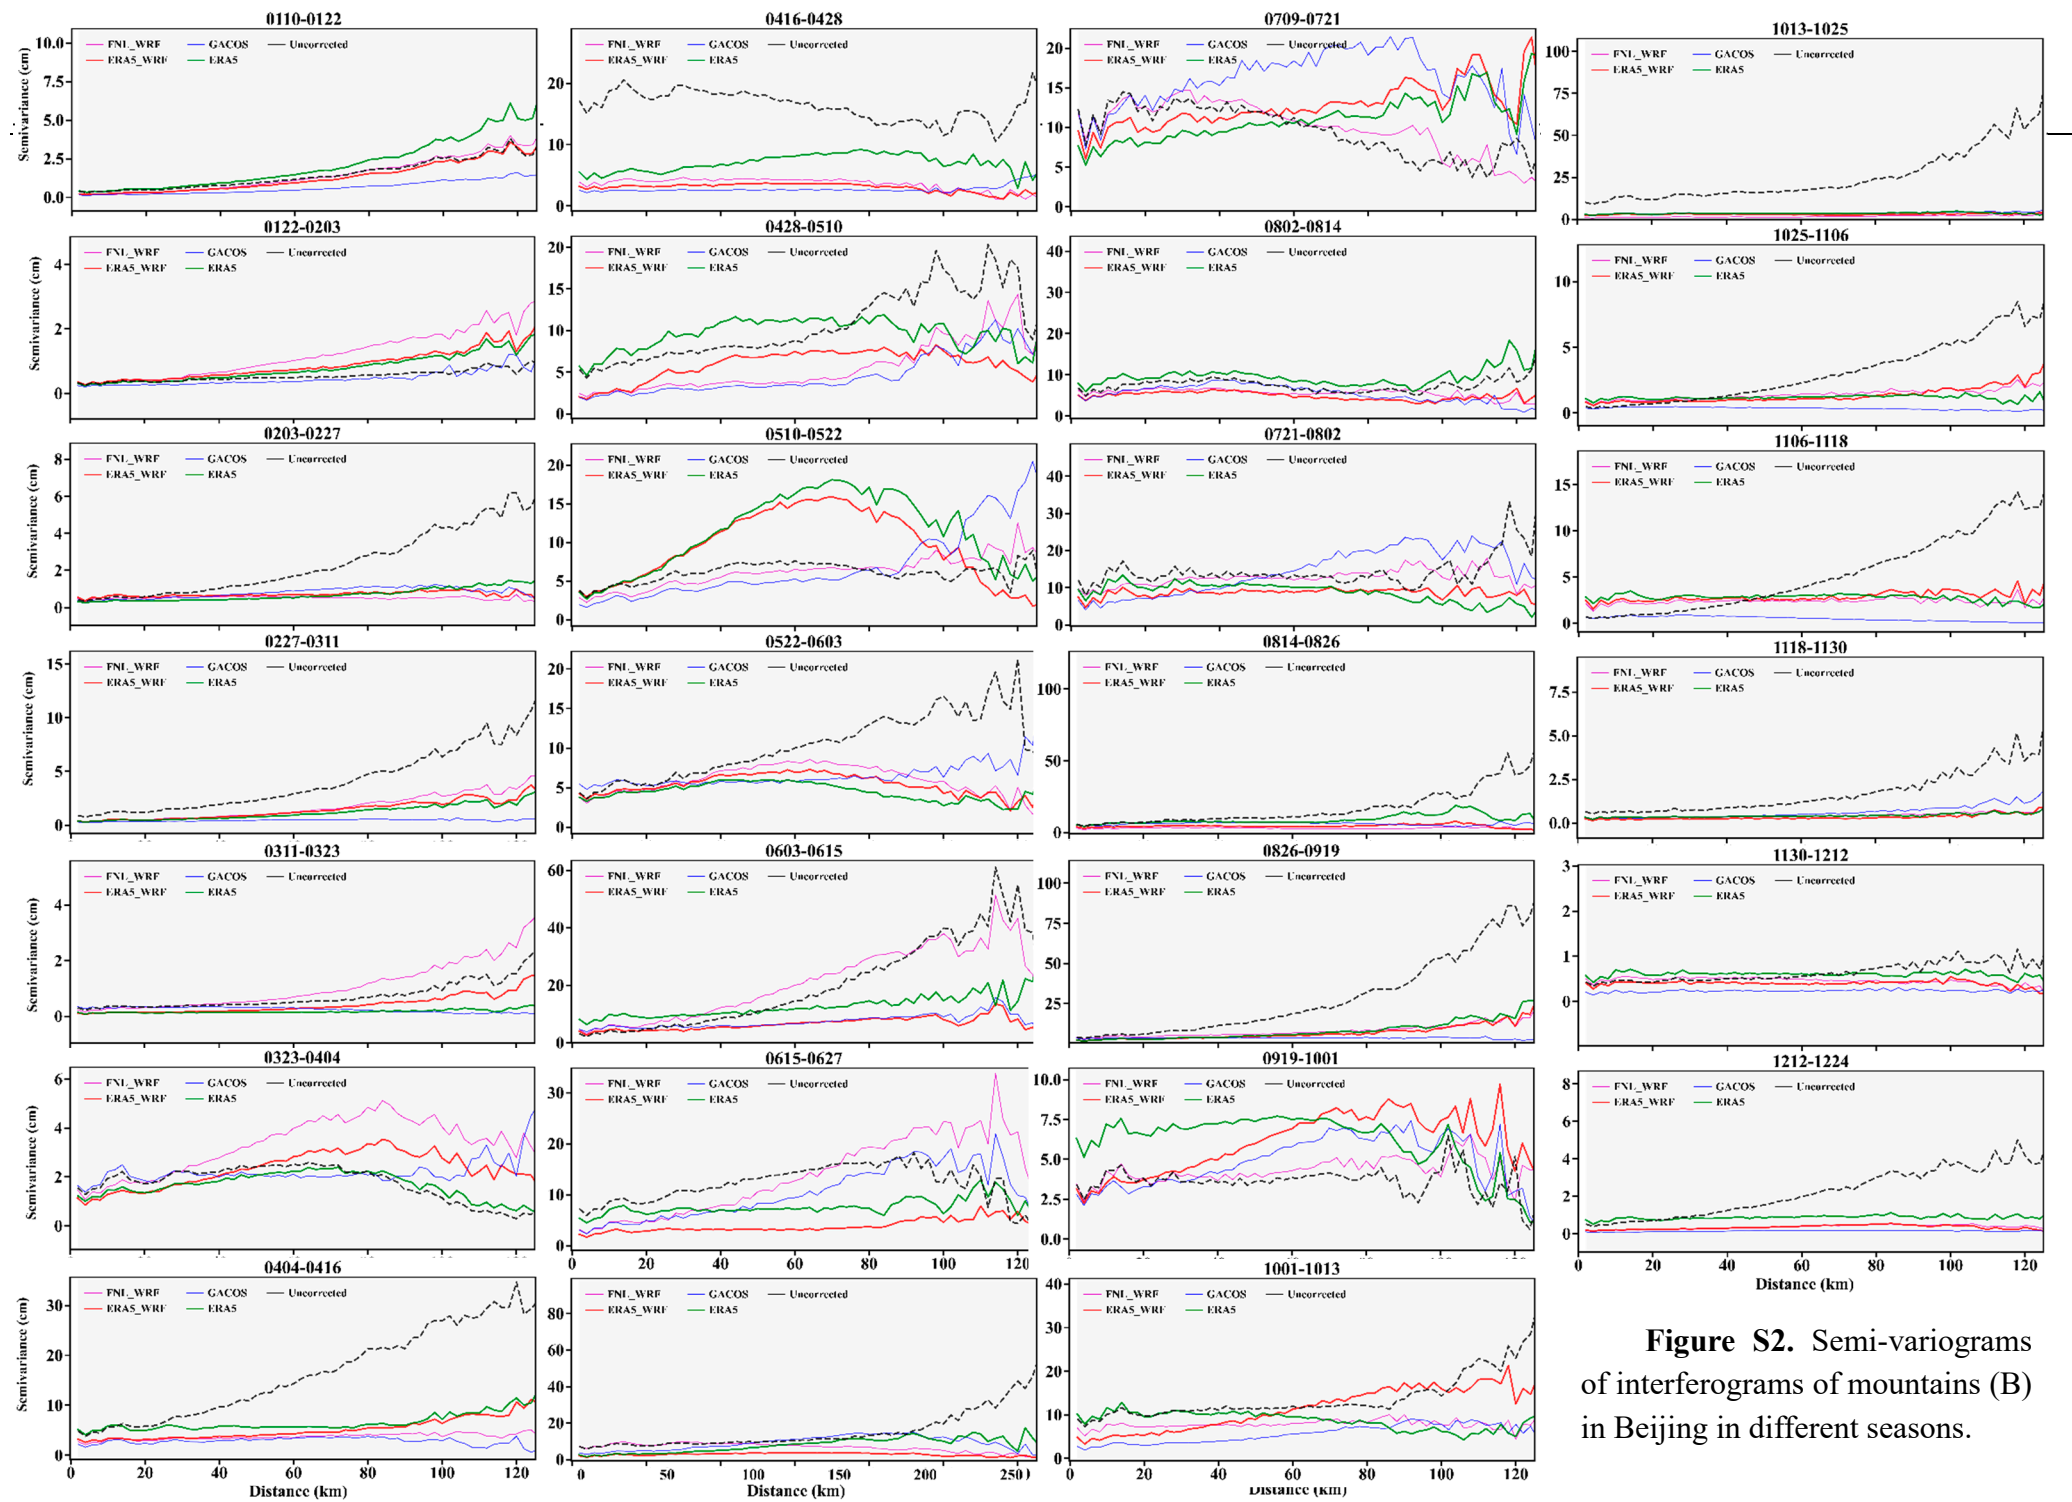

**Figure S2.** Semi-variograms of interferograms of mountains (B) in Beijing in different seasons.

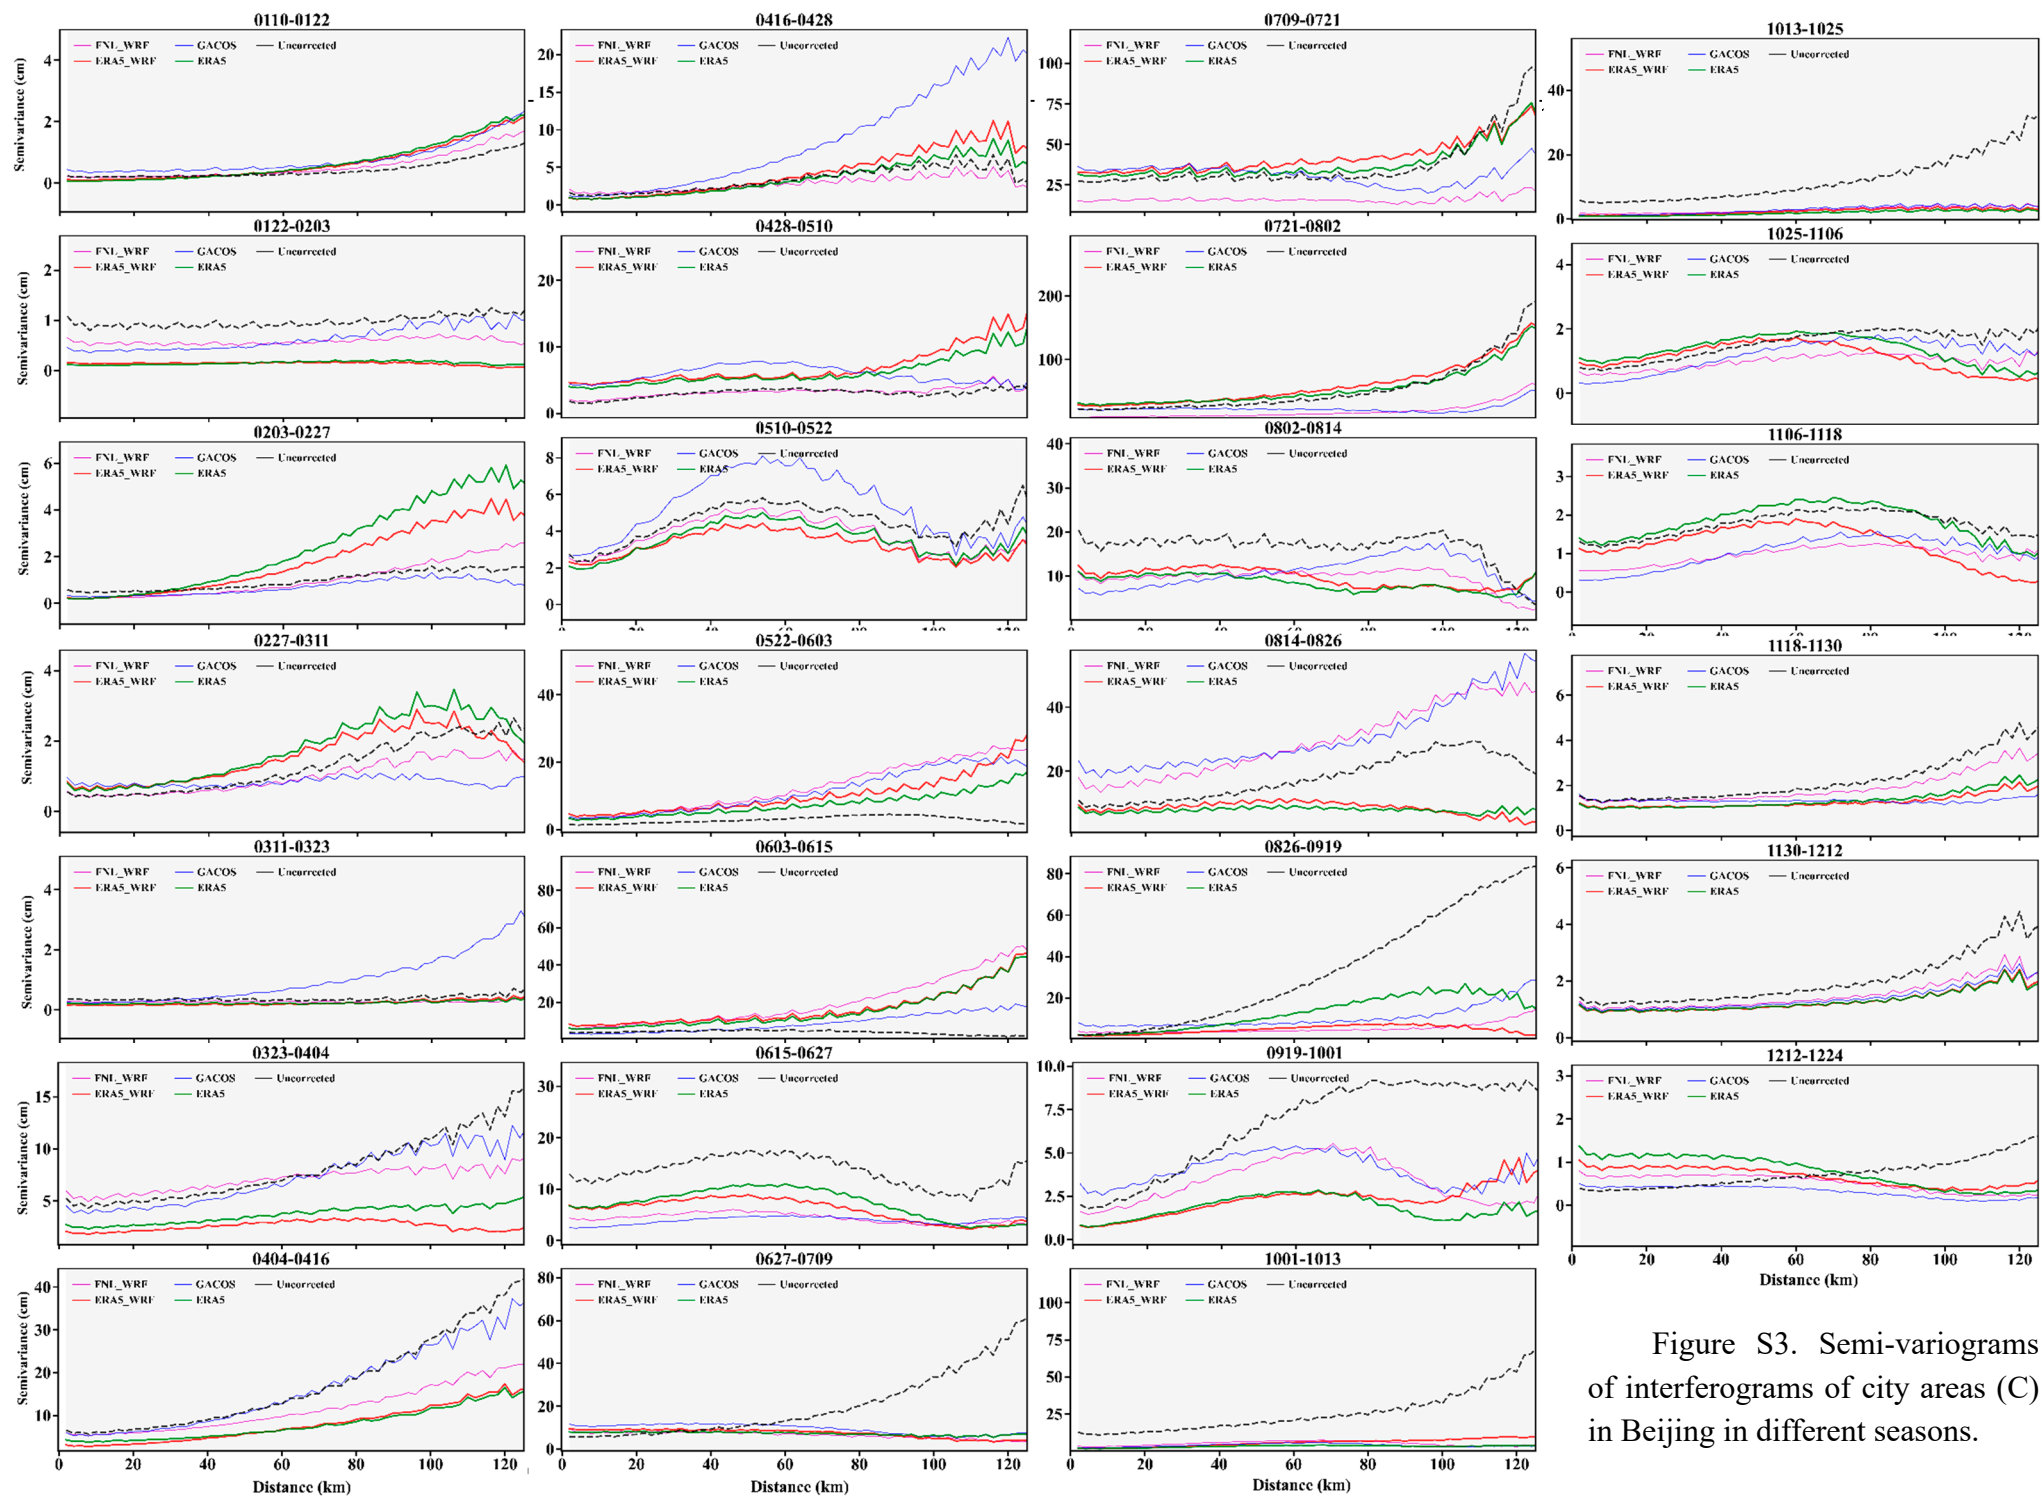

Figure S3. Semi-variograms of interferograms of city areas (C) in Beijing in different seasons.
